# Supplementary material for: Discovery of glycerol phosphate and an immunogenic glycan motif in rhamnose-rich polysaccharides of Streptococcus uberis
Source: Springer Nature journal article supplement (doi:10.1186/s13567-025-01574-0), 2025-07-07
Supplement: MOESM6 [file 13567_2025_1574_MOESM6_ESM.pdf]

## Additional file 6 NMR chemical shift prediction of the repeating unit structure of *S. uberis* RPS

### CASPER report

#### Streptococcus uberis RPS branched

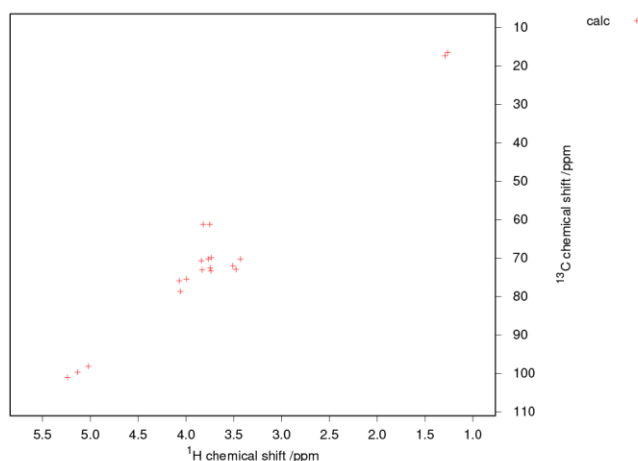

#### Predicted $^{13}\text{C}$ and $^1\text{H}$ NMR chemical shifts

##### Structure

$\rightarrow 3) [\alpha\text{-D-Glc}^{\text{iii}} (1\rightarrow 2) ]\alpha\text{-L-Rha}^{\text{ii}} (1\rightarrow 2) \alpha\text{-L-Rha}^{\text{i}} (1\rightarrow$

|                                                                  |        |       |       |       |       |       |      |
|------------------------------------------------------------------|--------|-------|-------|-------|-------|-------|------|
| $\rightarrow 2) \alpha\text{-L-Rha}^{\text{i}} (1\rightarrow$    | 1      | 2     | 3     | 4     | 5     | 6     |      |
| Expected Calc. Error: 8.73                                       | 101.04 | 78.66 | 70.66 | 72.92 | 69.91 | 17.36 |      |
|                                                                  | 5.24   | 4.06  | 3.84  | 3.48  | 3.74  | 1.29  |      |
| $\rightarrow 2,3) \alpha\text{-L-Rha}^{\text{ii}} (1\rightarrow$ | 1      | 2     | 3     | 4     | 5     | 6     |      |
| Expected Calc. Error: 9.66                                       | 99.70  | 75.93 | 75.47 | 72.59 | 70.25 | 16.45 |      |
|                                                                  | 5.13   | 4.07  | 3.99  | 3.75  | 3.77  | 1.26  |      |
| $\alpha\text{-D-Glc}^{\text{iii}} (1\rightarrow$                 | 1      | 2     | 3     | 4     | 5     | 6     | 6    |
| Expected Calc. Error: 6.61                                       | 98.17  | 72.00 | 73.31 | 70.27 | 73.07 | 61.23 |      |
|                                                                  | 5.02   | 3.51  | 3.74  | 3.43  | 3.83  | 3.75  | 3.82 |

Generated 2024-11-29 10:21:12+01:00.

**Additional file 6A** NMR chemical shift prediction by CASPER of the repeating unit structure of the RPS from *S. uberis* containing an  $\alpha\text{-D-Glc}p\text{-(1}\rightarrow 2\text{)}$ -linked side-chain residue.

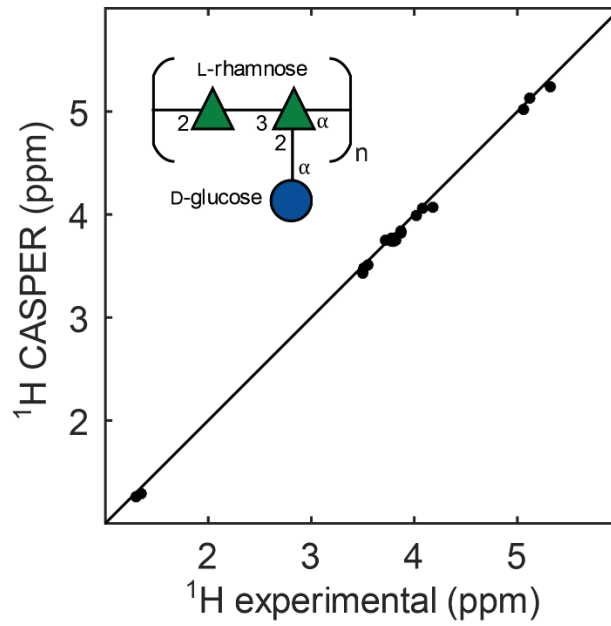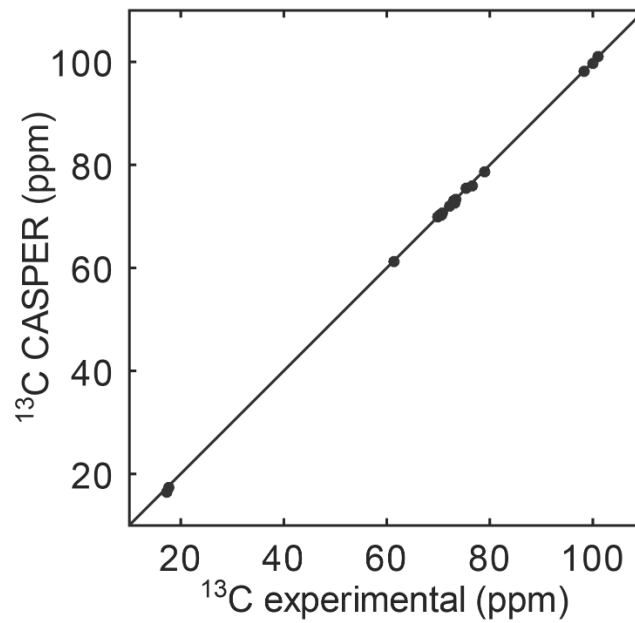

**Additional file 6B** Comparison of  $^1\text{H}$  (top) and  $^{13}\text{C}$  (bottom) NMR chemical shifts predicted by CASPER versus assigned by NMR experiments for the repeating unit structure (schematically inserted in the top panel) containing the  $\alpha$ -D-Glcp-(1 $\rightarrow$ 2)-linked side-chain residue of the RPS from *S. uberris*.

**Streptococcus uberis RPS branched P-substituent**

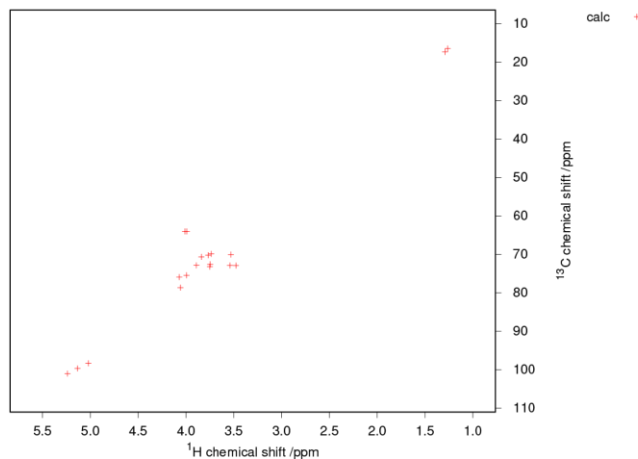

**Predicted <sup>13</sup>C and <sup>1</sup>H NMR chemical shifts**

**Structure**

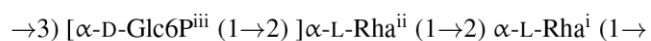

|                                 |        |       |       |       |       |       |      |
|---------------------------------|--------|-------|-------|-------|-------|-------|------|
| →2) α-L-Rha <sup>i</sup> (1→    | 1      | 2     | 3     | 4     | 5     | 6     |      |
| Expected Calc. Error: 8.73      | 101.04 | 78.66 | 70.66 | 72.92 | 69.91 | 17.36 |      |
|                                 | 5.24   | 4.06  | 3.84  | 3.48  | 3.74  | 1.29  |      |
| →2,3) α-L-Rha <sup>ii</sup> (1→ | 1      | 2     | 3     | 4     | 5     | 6     |      |
| Expected Calc. Error: 9.66      | 99.70  | 75.93 | 75.47 | 72.59 | 70.25 | 16.45 |      |
|                                 | 5.13   | 4.07  | 3.99  | 3.75  | 3.77  | 1.26  |      |
| α-D-Glc6P <sup>iii</sup> (1→    | 1      | 2     | 3     | 4     | 5     | 6     | 6    |
| Expected Calc. Error: 6.61      | 98.37  | 72.90 | 73.21 | 70.07 | 72.87 | 64.03 |      |
|                                 | 5.02   | 3.54  | 3.75  | 3.53  | 3.89  | 3.99  | 4.01 |

Generated 2024-11-29 10:25:08+01:00.

**Additional file 6C** NMR chemical shift prediction by CASPER of a repeating unit structure corresponding to the RPS from *S. uberis* containing an α-D-Glcp-(1→2)-linked side-chain residue carrying a phosphate group at O6.
